# Supplementary material for: In Vitro and In Silico Analyses of New Cinnamid and Rosmarinic Acid-Derived Compounds Biosynthesized in Escherichia coli as Leishmania amazonensis Arginase Inhibitors
Source: MDPI journal article supplement (doi:10.3390/pathogens11091020), 2022-09-07
Supplement: s1 [file s1]

Supplementary Materials

# In Vitro and In Silico Analyses of New Cinnamid and Rosmarinic Acid-Derived Compounds Biosynthesized in *Escherichia coli* as *Leishmania amazonensis* Arginase Inhibitors

Julio Abel Alfredo dos Santos Simone Come <sup>1,†</sup>, Yibin Zhuang <sup>2,3,†</sup>, Tianzhen Li <sup>2,3</sup>, Simone Brogi <sup>4,\*</sup>, Sandra Gemma <sup>5</sup>, Tao Liu <sup>2,3,\*</sup> and Edson Roberto da Silva <sup>6,\*</sup>

<sup>1</sup> Departamento de Pré-Clínicas, Faculdade de Veterinária, Universidade Eduardo Mondlane, Av. de Moçambique, Km 1.5, Maputo CP 257, Mozambique

<sup>2</sup> Tianjin Institute of Industrial Biotechnology, Chinese Academy of Sciences, Tianjin 300308, China

<sup>3</sup> Key Laboratory of Systems Microbial Biotechnology, Chinese Academy of Sciences, Tianjin 300308, China

<sup>4</sup> Department of Pharmacy, University of Pisa, Via Bonanno 6, 56126 Pisa, Italy

<sup>5</sup> Department of Biotechnology, Chemistry and Pharmacy, University of Siena, Via Aldo Moro 2, 53100 Siena, Italy

<sup>6</sup> Laboratório Farmacologia e Bioquímica (LFBq), Departamento de Medicina Veterinária, Universidade de São Paulo Faculdade de Zootecnia e Engenharia de Alimentos, Pirassununga 13635-900, SP, Brazil

\* Correspondence: simone.brogi@unipi.it (S.B.); liu\_t@tib.cas.cn (T.L.); edsilva@usp.br (E.R.d.S.); Tel.: +39-050-2219613 (S.B.); +86-22-24828718 (T.L.); +55-19-35656828 (E.R.d.S.)

† These authors contributed equally to this work.

**Citation:** Come, J.A.A.d.S.S.; Zhuang, Y.; Li, T.; Brogi, S.; Gemma, S.; Liu, T.; da Silva, E.R. In Vitro and In Silico Analyses of New Cinnamid and Rosmarinic Acid-Derived Compounds Biosynthesized in *Escherichia coli* as *Leishmania amazonensis* Arginase Inhibitors. *Pathogens* **2022**, *11*, 1020. <https://doi.org/10.3390/pathogens11091020>

Academic Editor: Nicola Carter

Received: 10 August 2022

Accepted: 6 September 2022

Published: 7 September 2022

**Publisher's Note:** MDPI stays neutral with regard to jurisdictional claims in published maps and institutional affiliations.

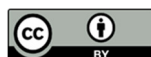

**Copyright:** © 2022 by the authors. Licensee MDPI, Basel, Switzerland. This article is an open access article distributed under the terms and conditions of the Creative Commons Attribution (CC BY) license (<http://creativecommons.org/licenses/by/4.0/>).

## Table of Contents

**Figure S1** <sup>1</sup>H spectrum of isolated compound 8 in CD<sub>3</sub>OD

**Page S2**

**Figure S2** <sup>13</sup>C spectrum of isolated compound 8 in CD<sub>3</sub>OD

**Page S2**

**Figure S3** <sup>1</sup>H spectrum of isolated compound 9 in CD<sub>3</sub>OD

**Page S3**

**Figure S4** <sup>13</sup>C spectrum of isolated compound 9 in CD<sub>3</sub>OD

**Page S3**

**Figure S5** <sup>1</sup>H spectrum of isolated compound 10 in CD<sub>3</sub>OD

**Page S4**

**Figure S6** <sup>13</sup>C spectrum of isolated compound 10 in CD<sub>3</sub>OD

**Page S4**

**Figure S7** MS spectra of compounds 8-10

**Page S5**

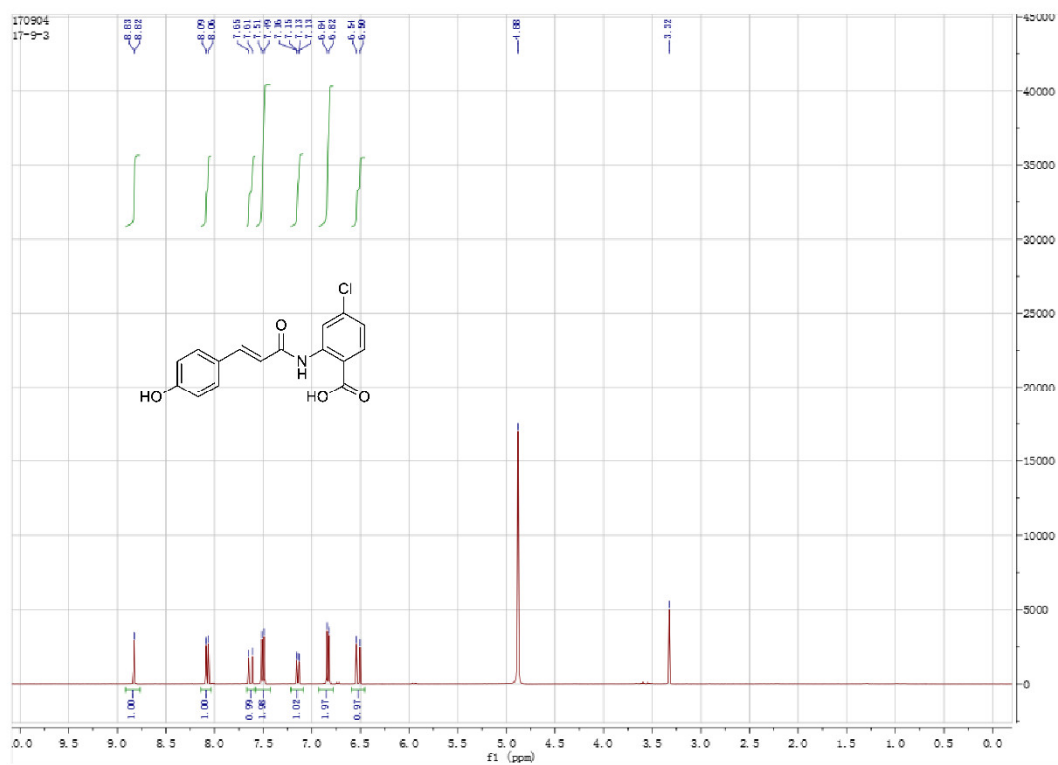

Figure S1. <sup>1</sup>H spectrum of isolated compound 8 in CD<sub>3</sub>OD.

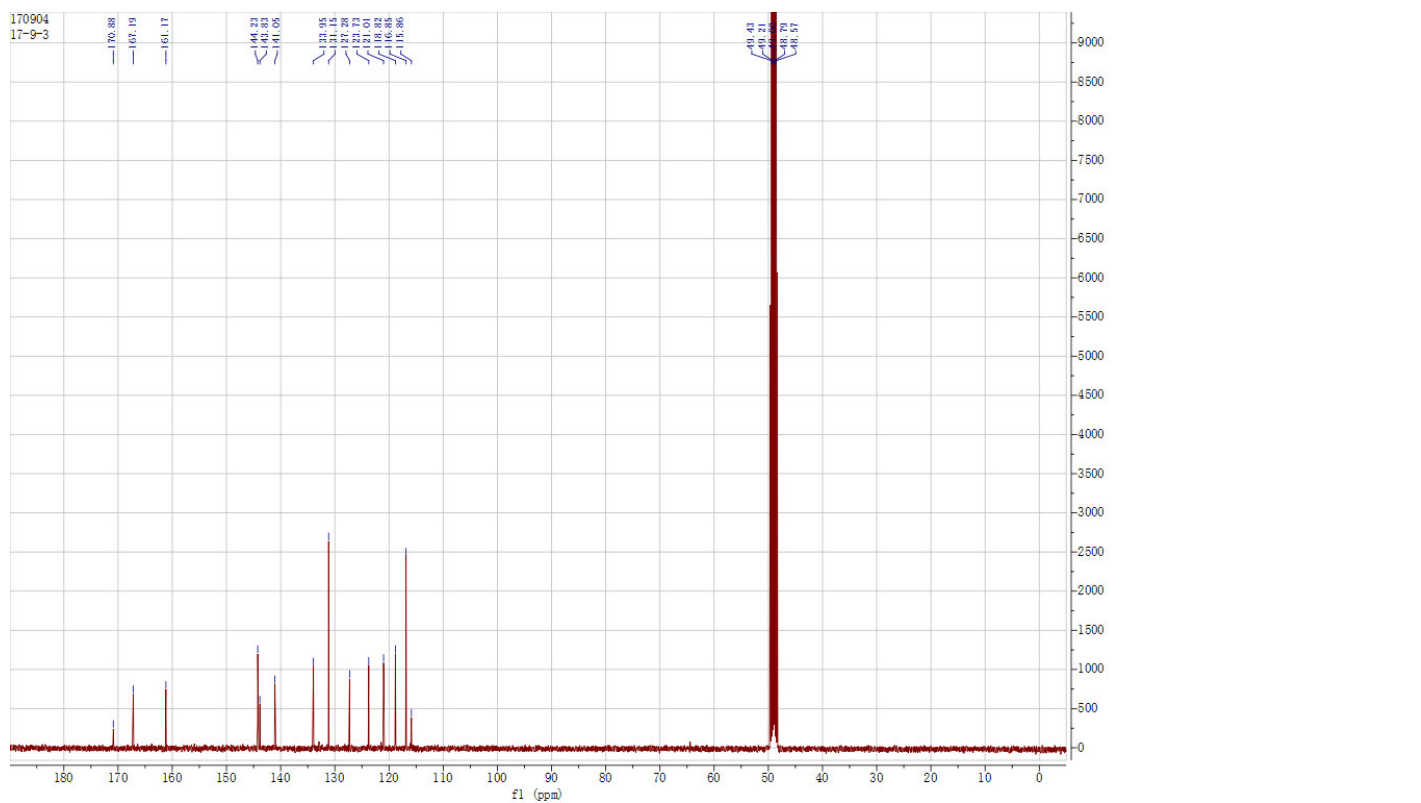

Figure S2. <sup>13</sup>C spectrum of isolated compound 8 in CD<sub>3</sub>OD.

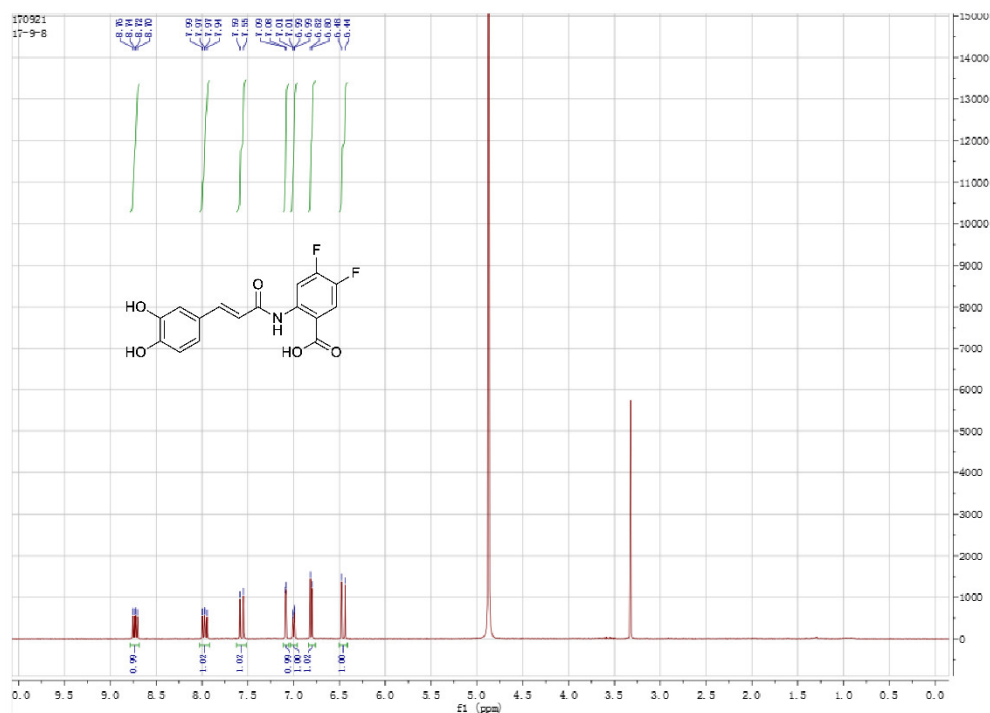

**Figure S3.** <sup>1</sup>H spectrum of isolated compound 9 in CD<sub>3</sub>OD.

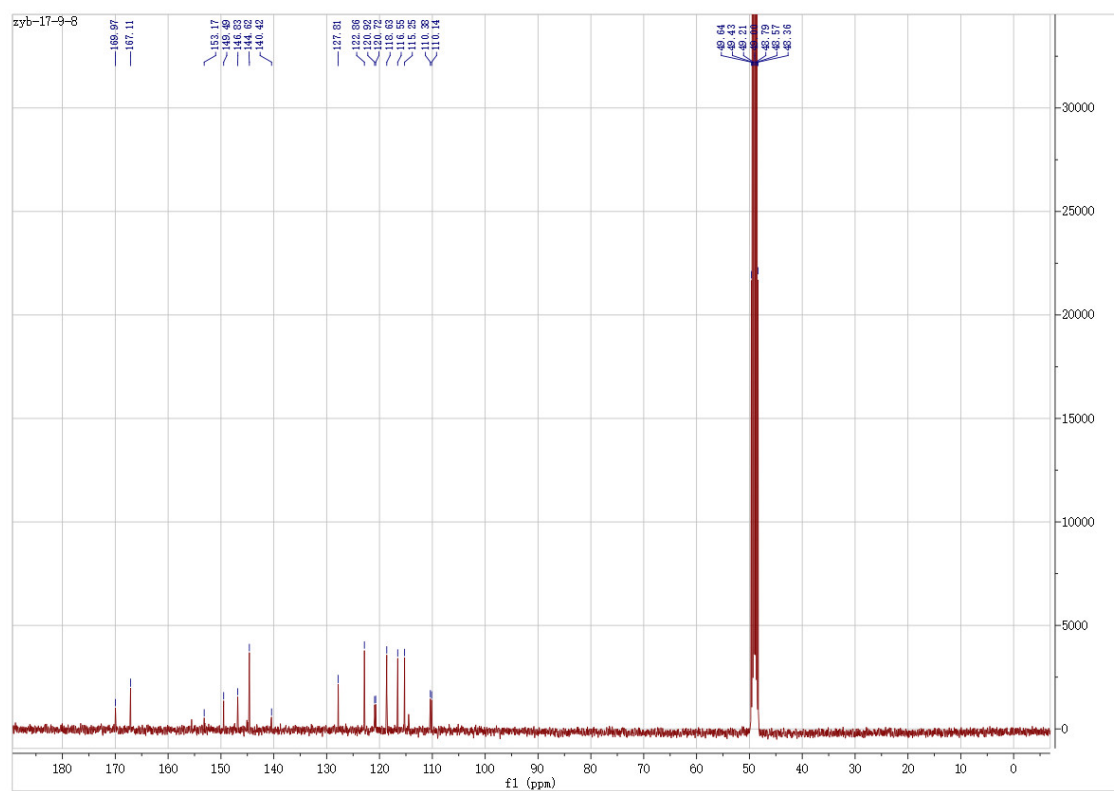

**Figure S4.** <sup>13</sup>C spectrum of isolated compound 9 in CD<sub>3</sub>OD.

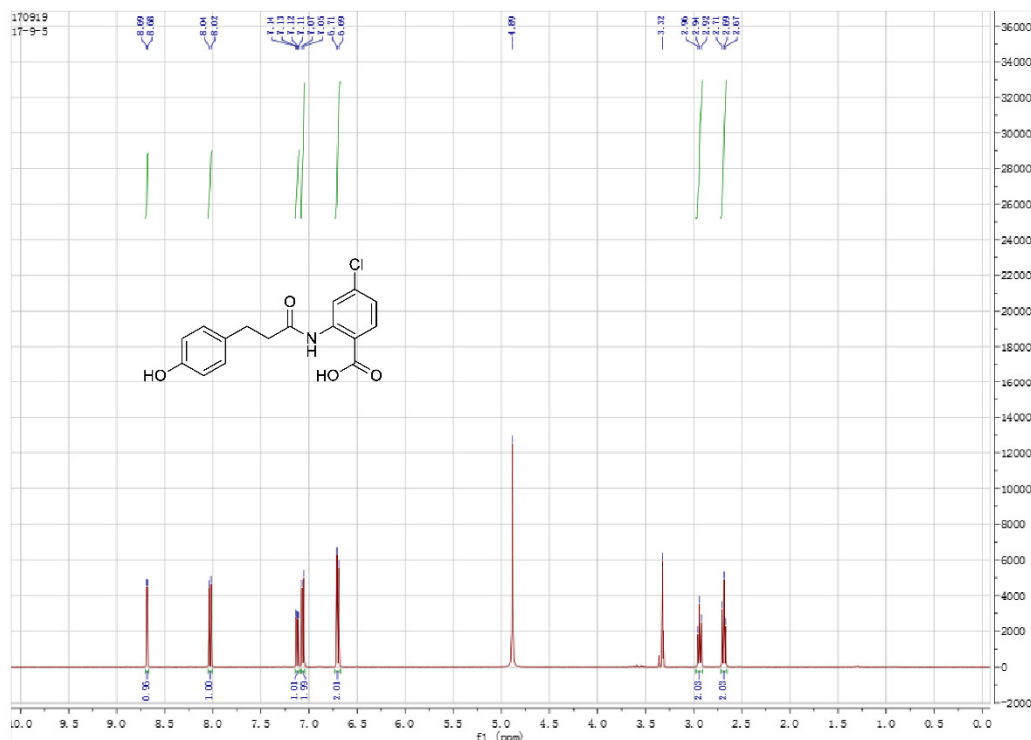

Figure S5. <sup>1</sup>H spectrum of isolated compound 10 in CD<sub>3</sub>OD.

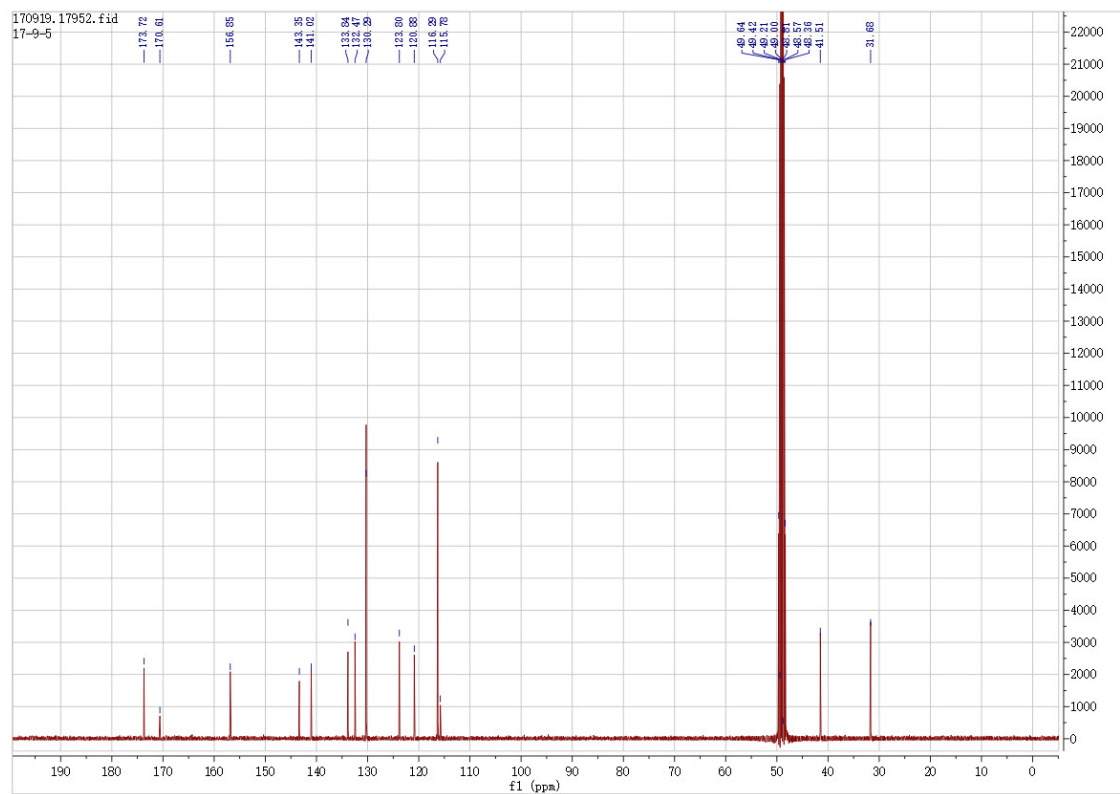

Figure S6. <sup>13</sup>C spectrum of isolated compound 10 in CD<sub>3</sub>OD.

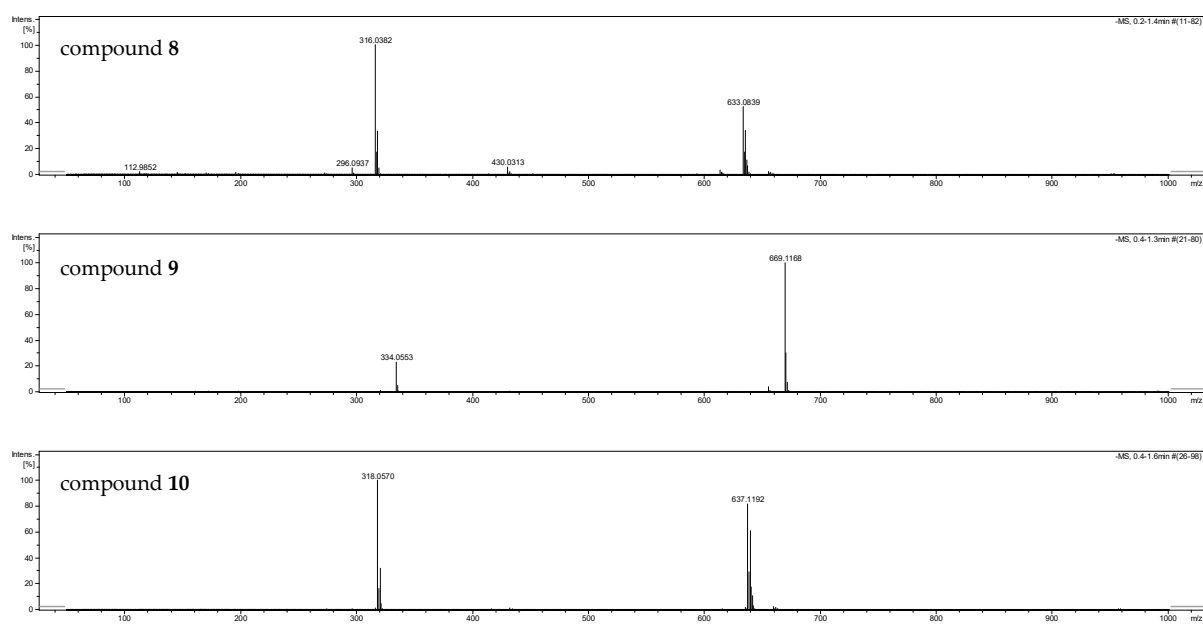

**Figure S7.** MS spectra of compounds 8-10.
